# Supplementary material for: Rostral Anterior Cingulate Thickness Predicts the Emotional Psilocybin Experience
Source: PubMed Central journal article supplement (PMC7168190; doi:10.3390/biomedicines8020034), 2020-02-18

# Unity

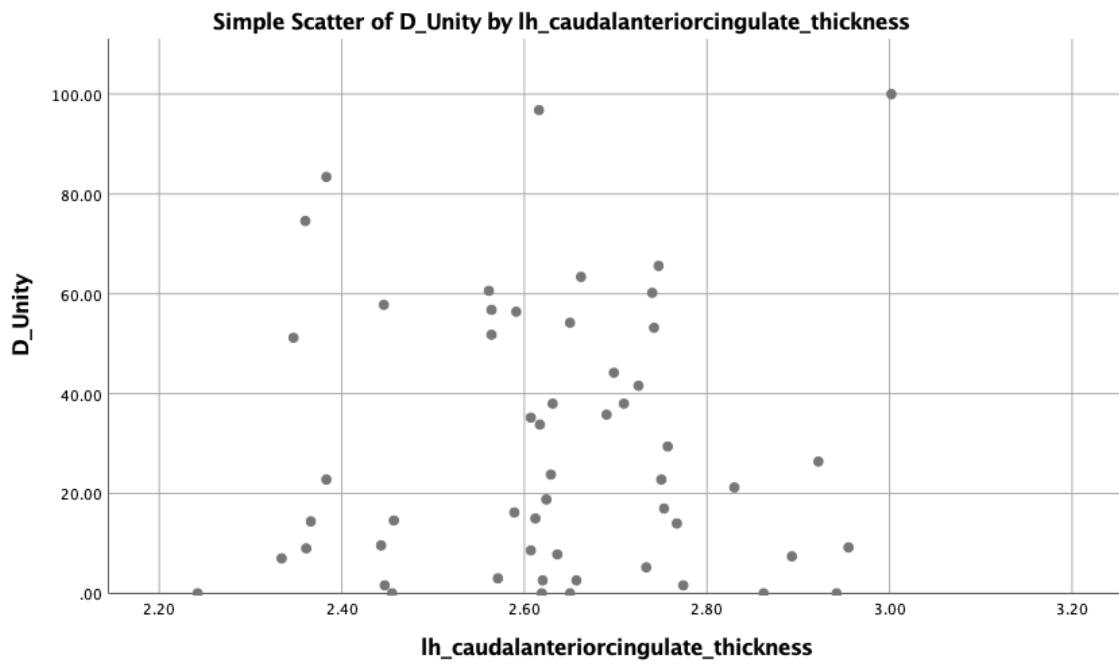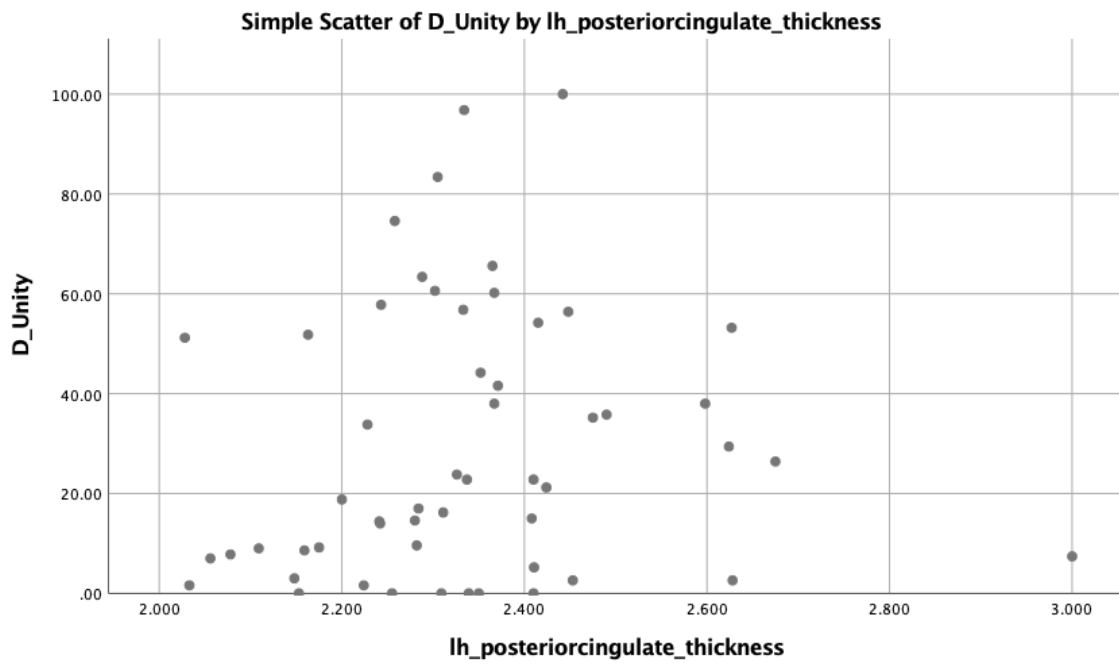

Simple Scatter of D\_Unity by lh\_rostralanteriorcingulate\_thickness

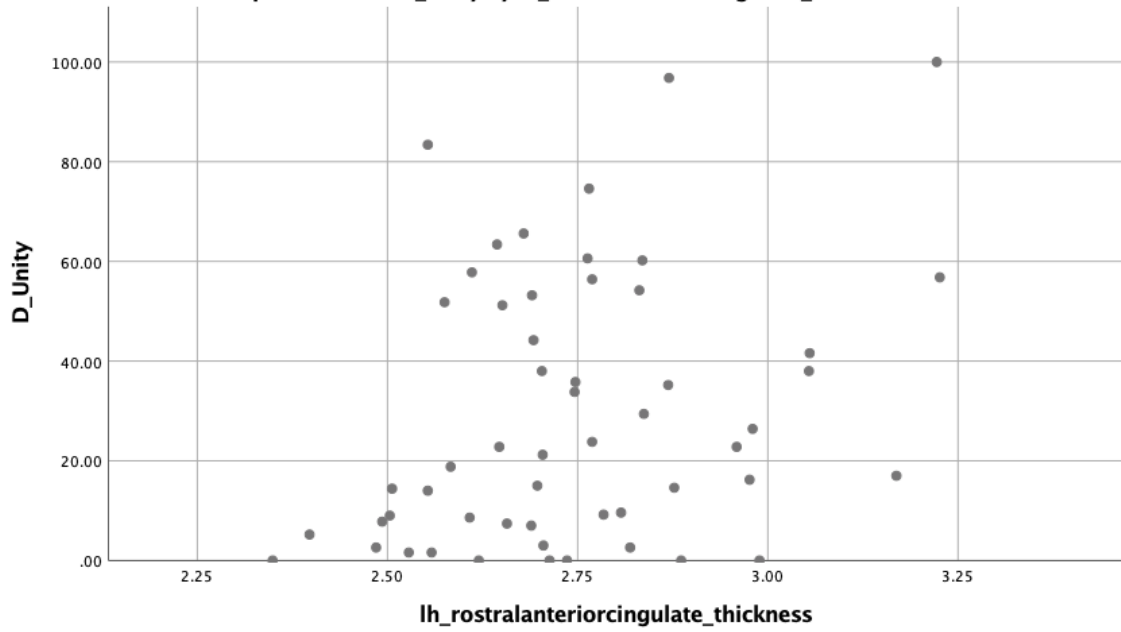

Simple Scatter of D\_Unity by rh\_caudalanteriorcingulate\_thickness

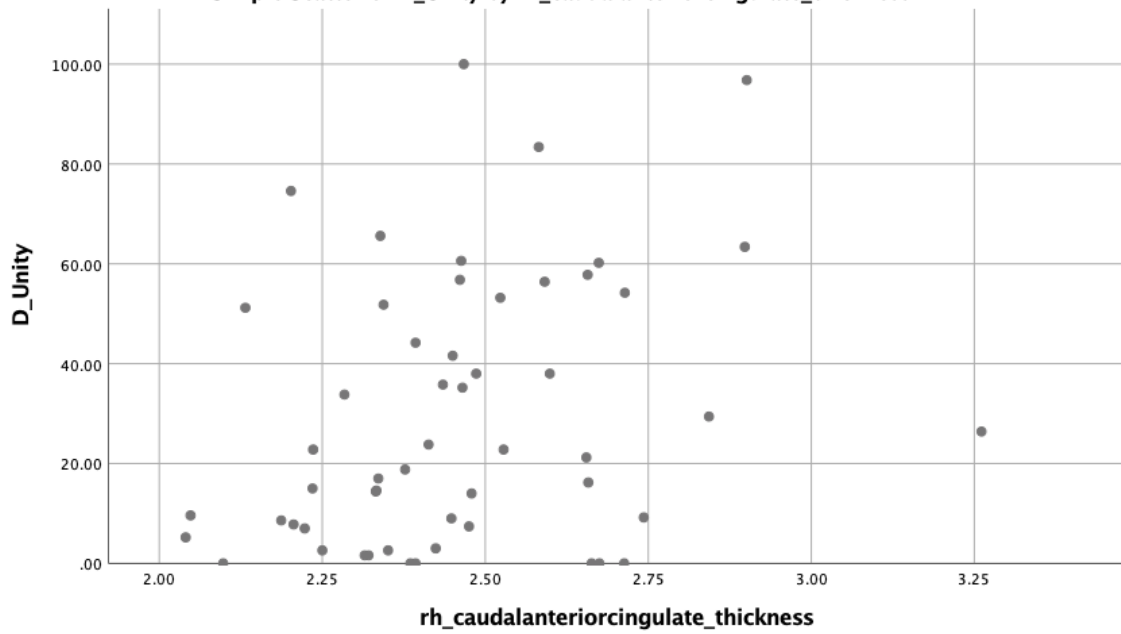

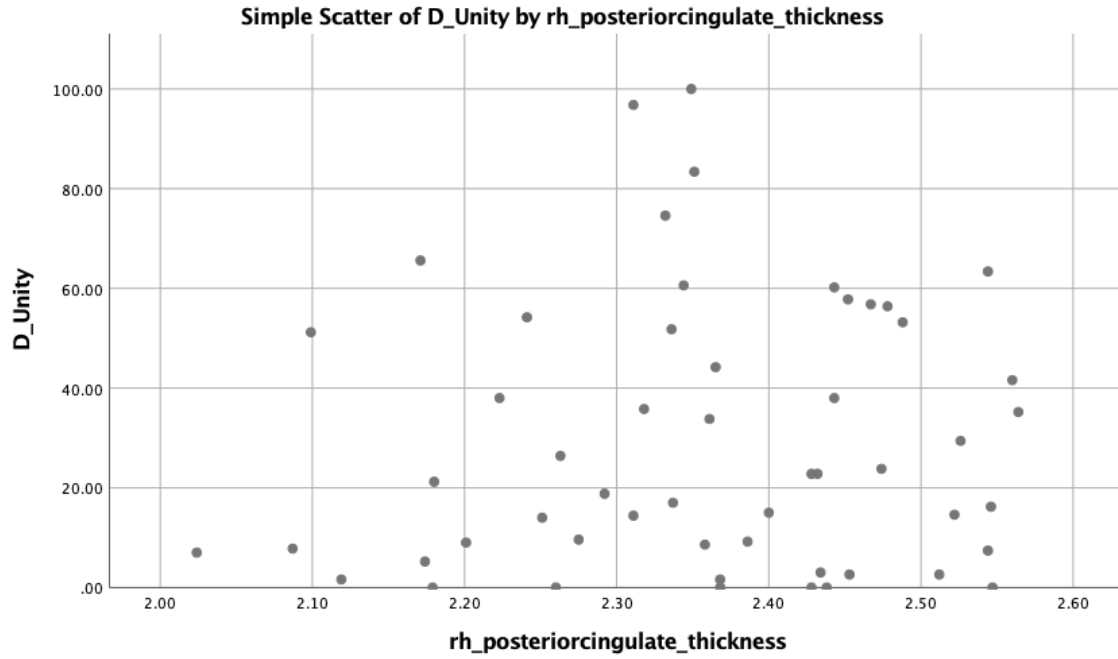

Spiritual Experience

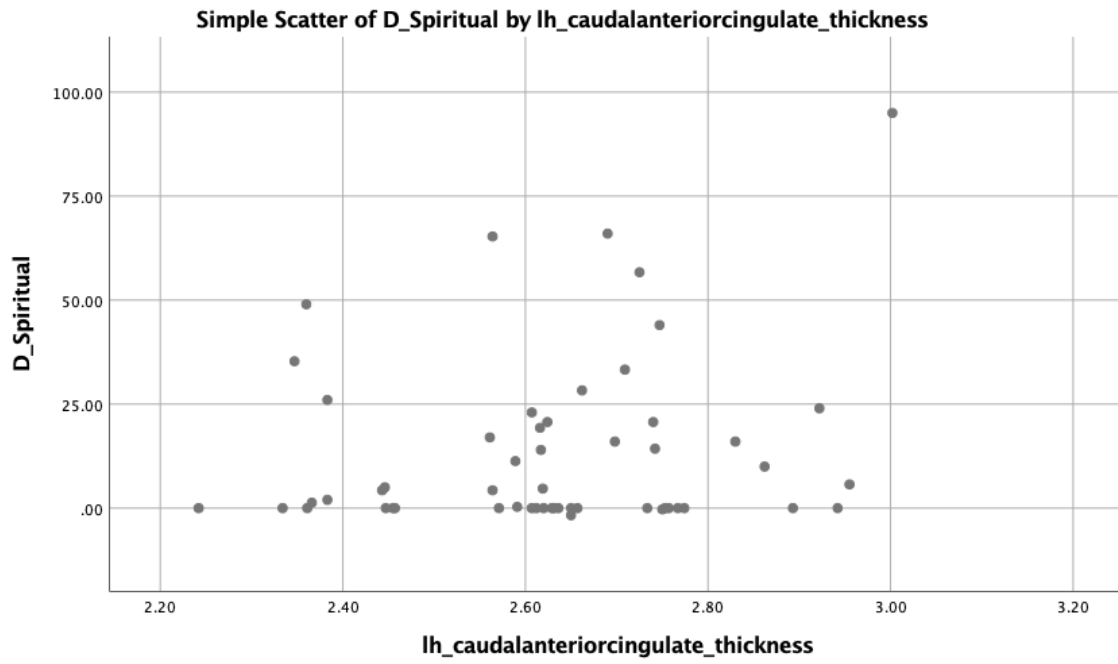

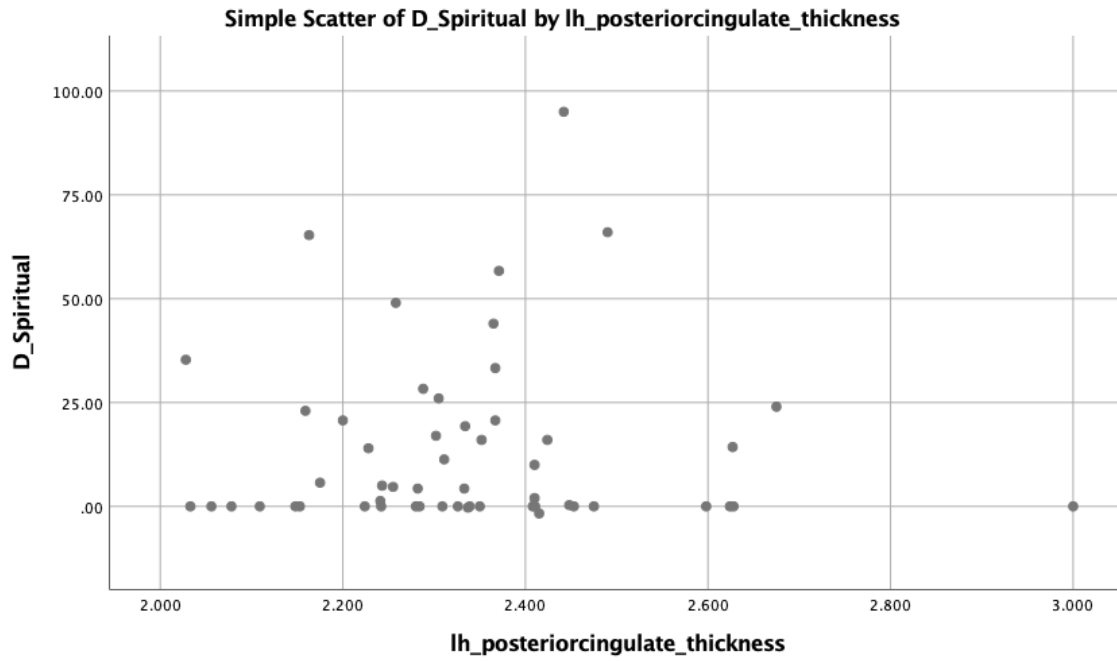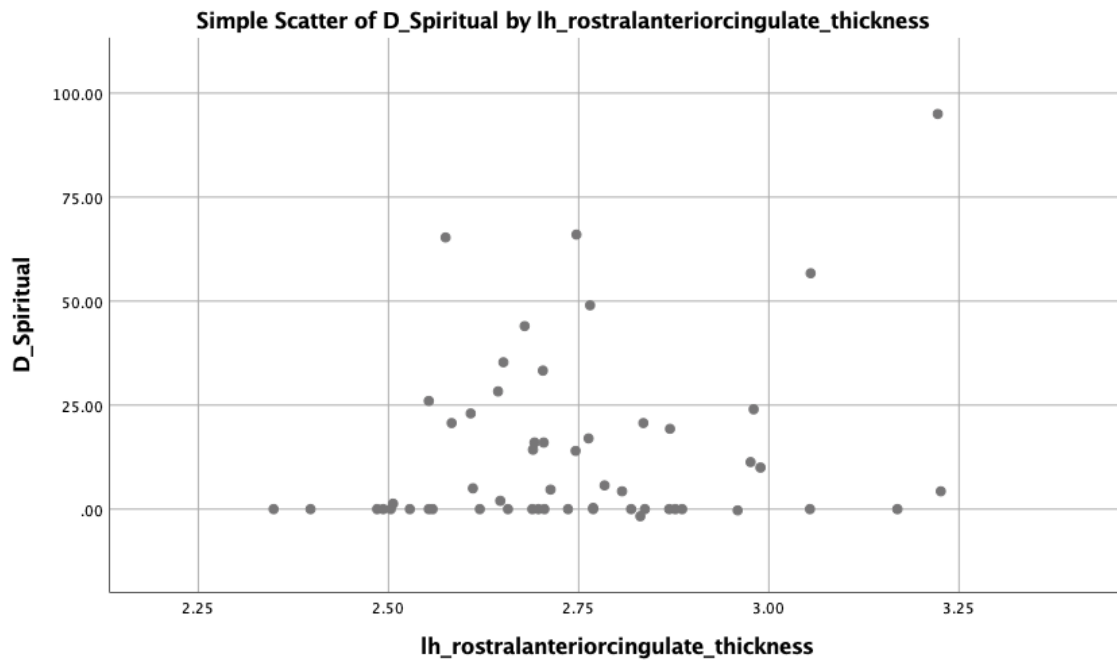

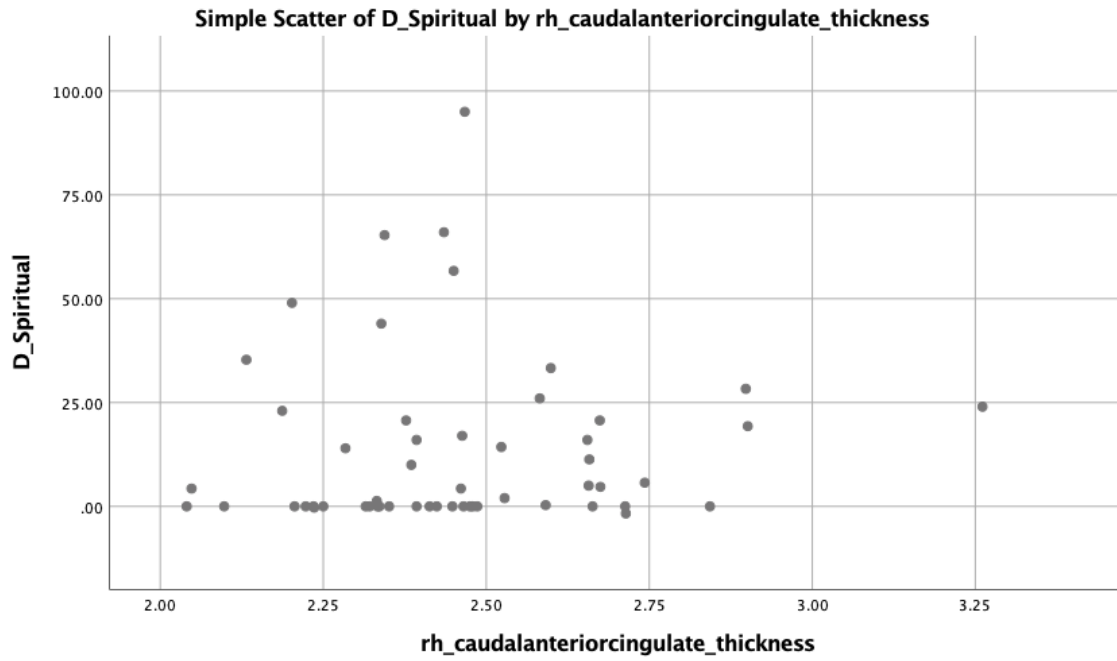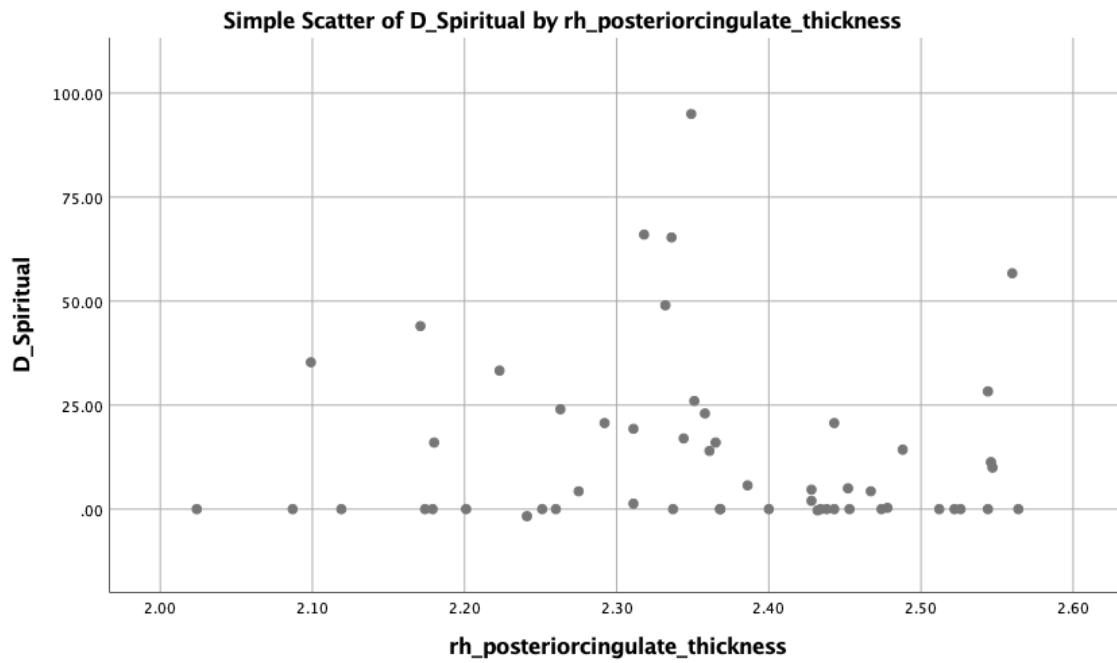

Bliss

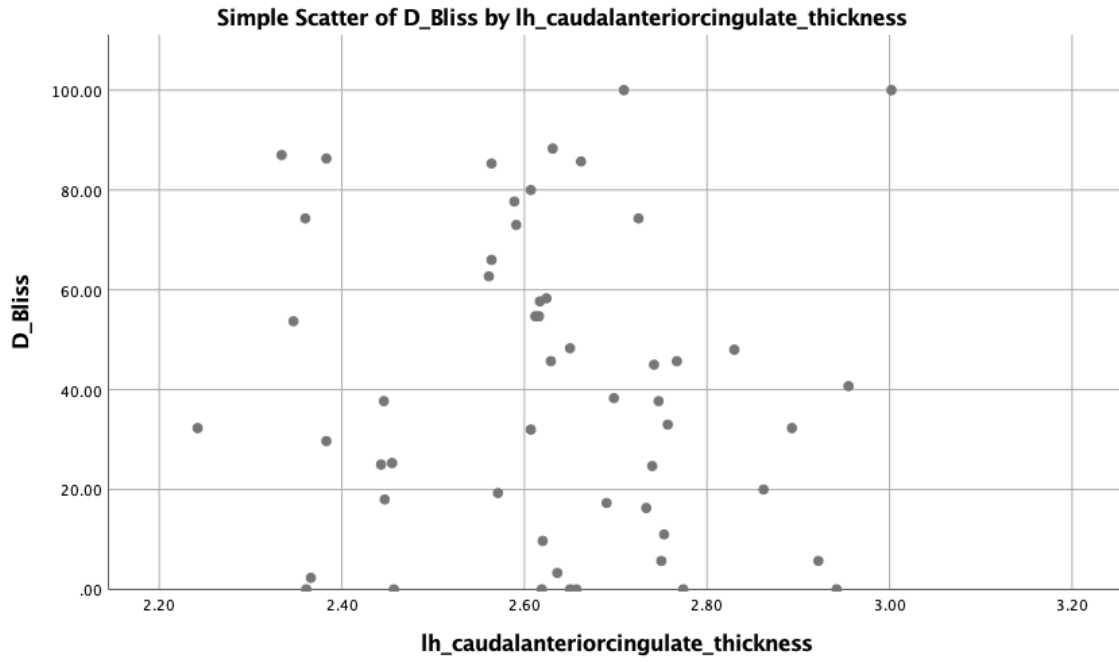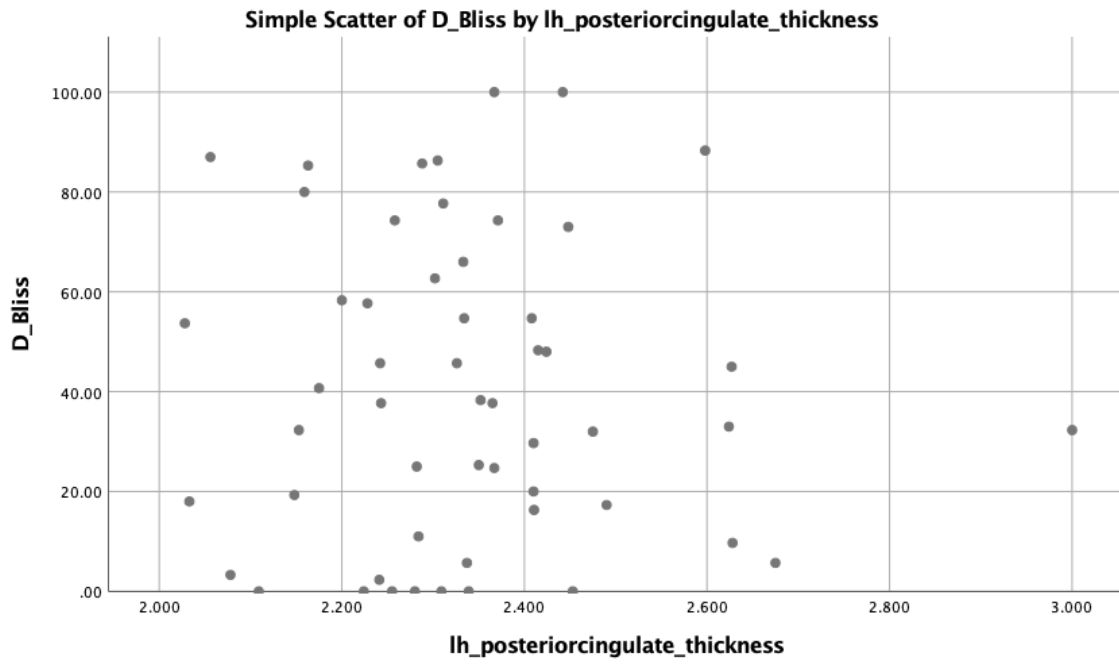

Simple Scatter of D\_Bliss by lh\_rostralanteriorcingulate\_thickness

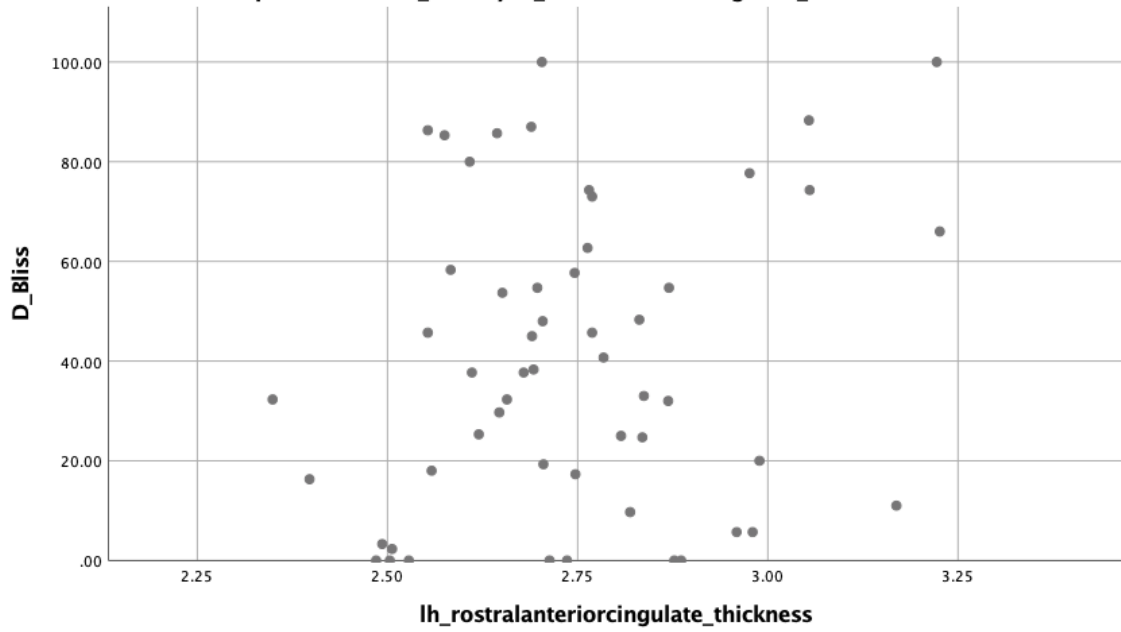

Simple Scatter of D\_Bliss by rh\_caudalanteriorcingulate\_thickness

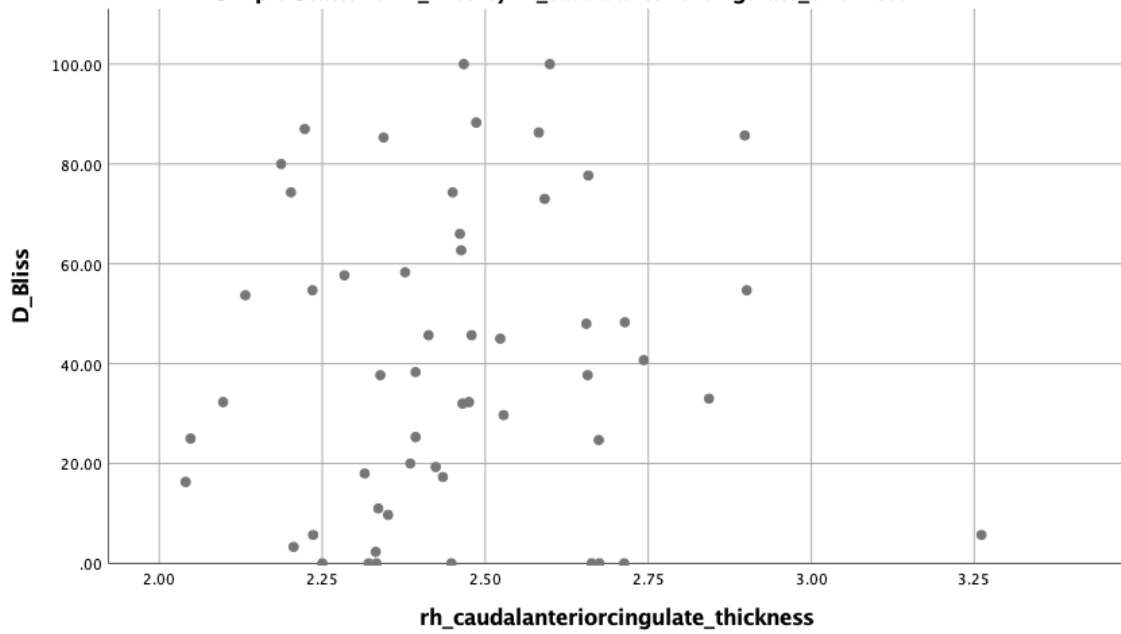

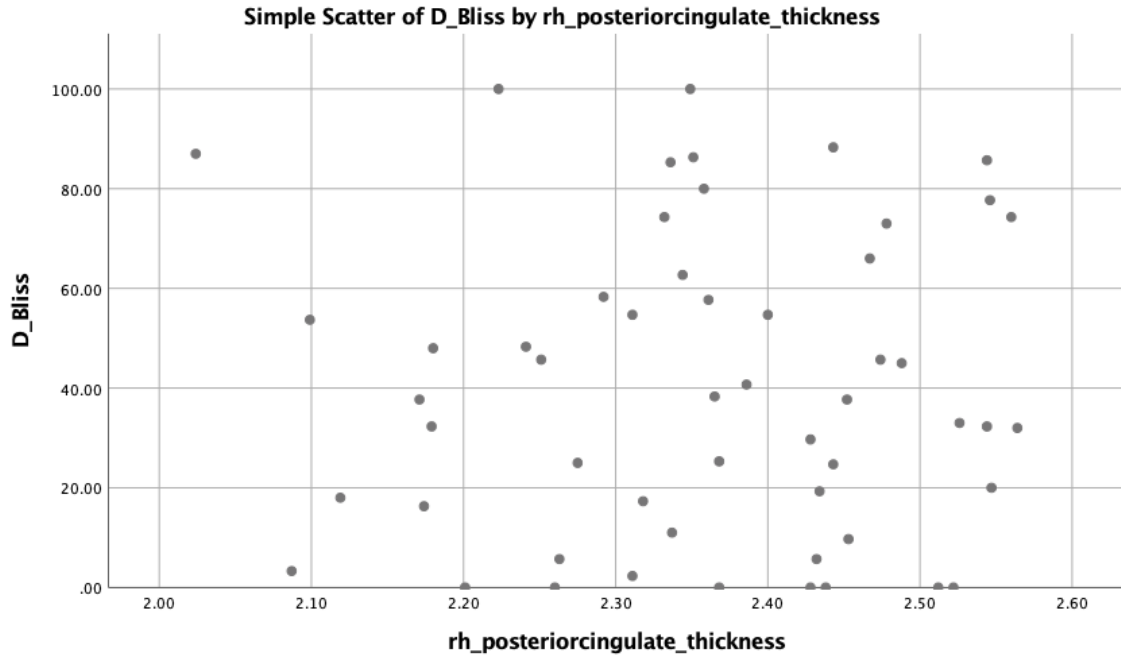

## Insightfulness

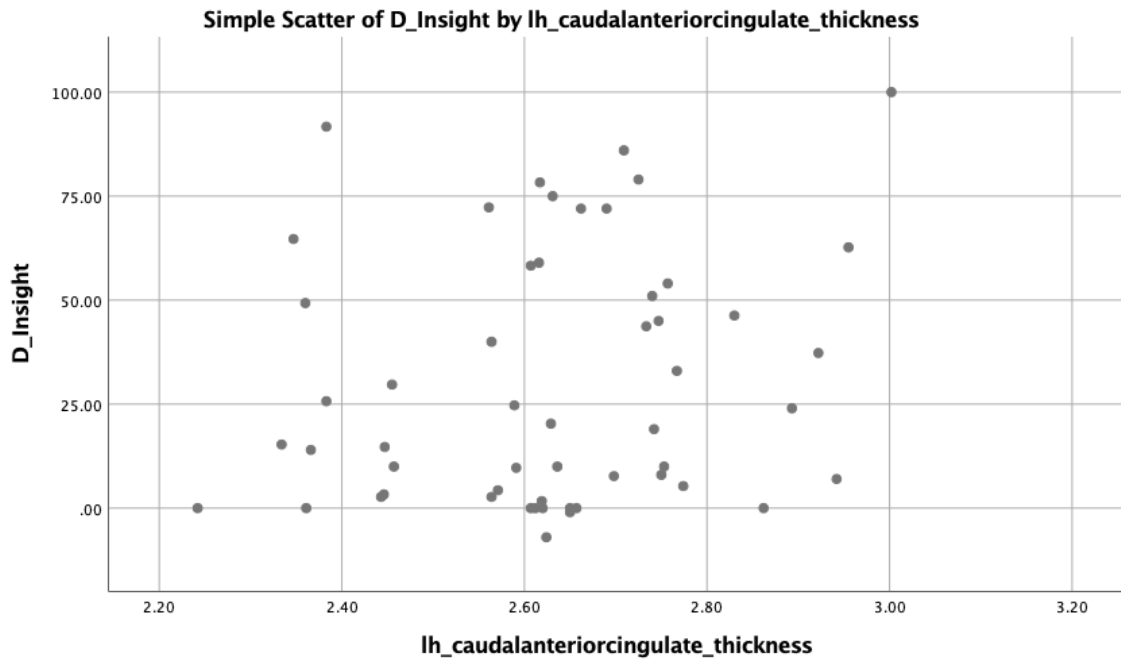



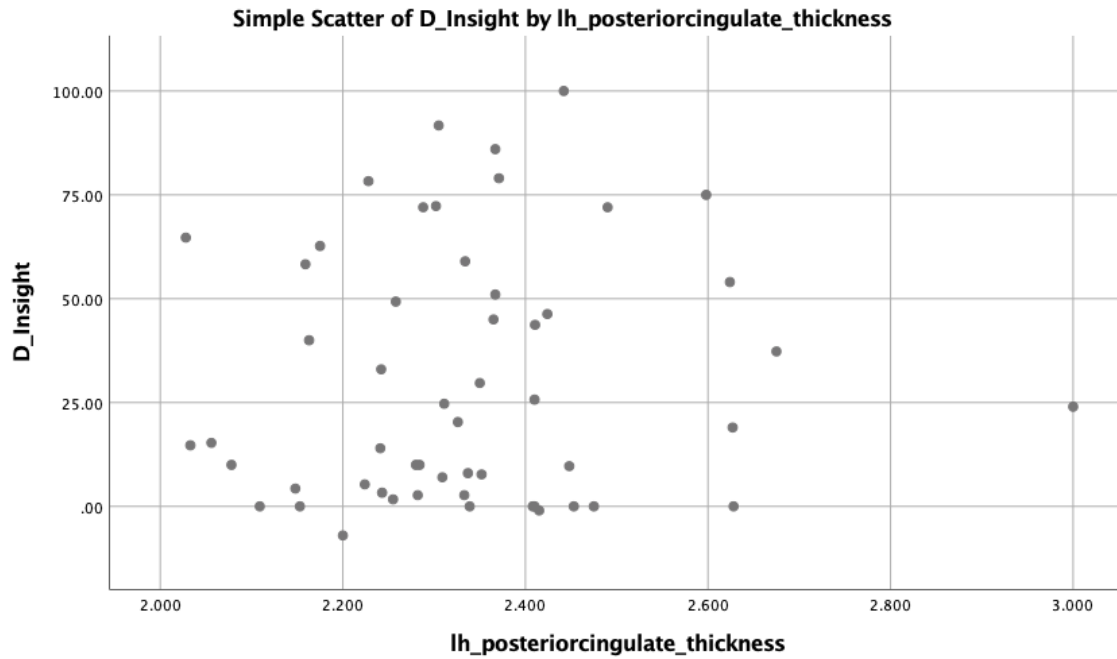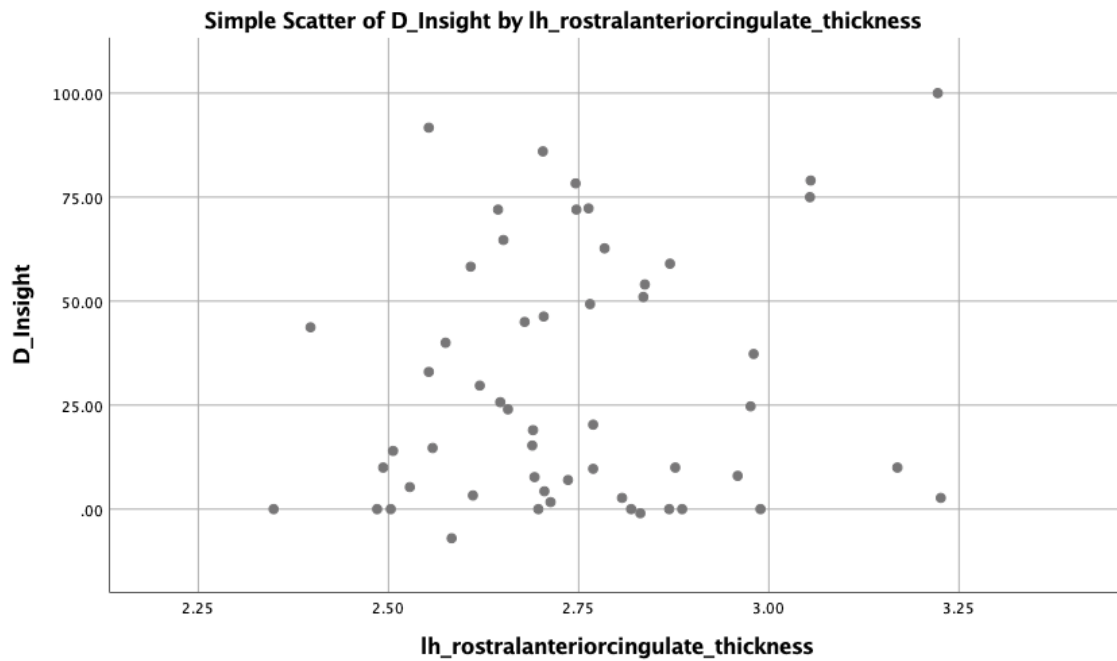

Simple Scatter of D\_Insight by rh\_caudalanteriorcingulate\_thickness

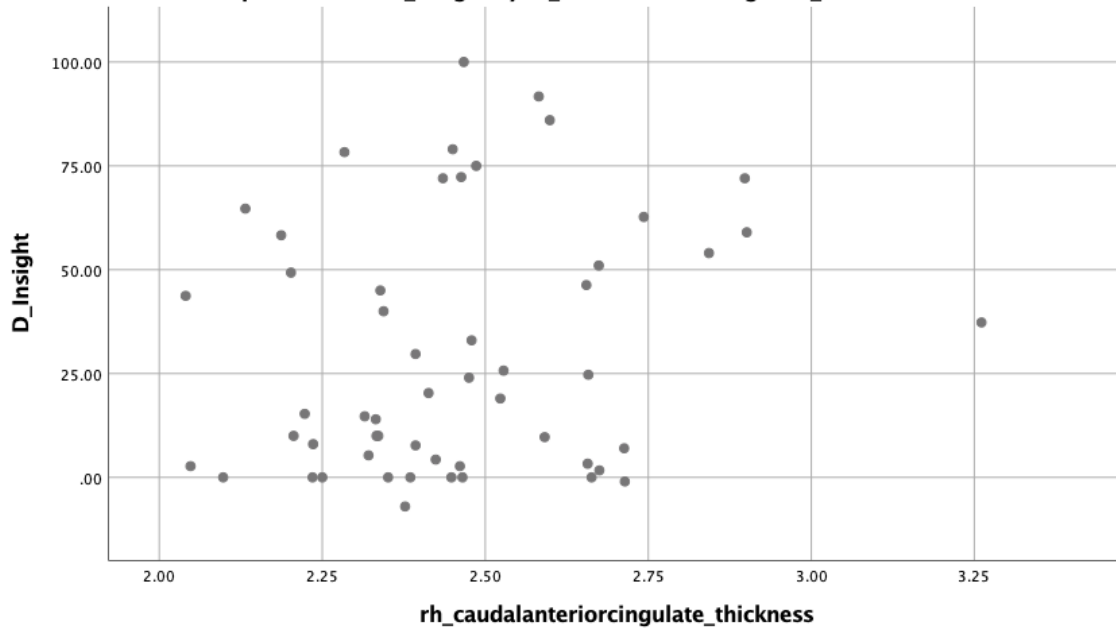

Simple Scatter of D\_Insight by rh\_posteriorcingulate\_thickness

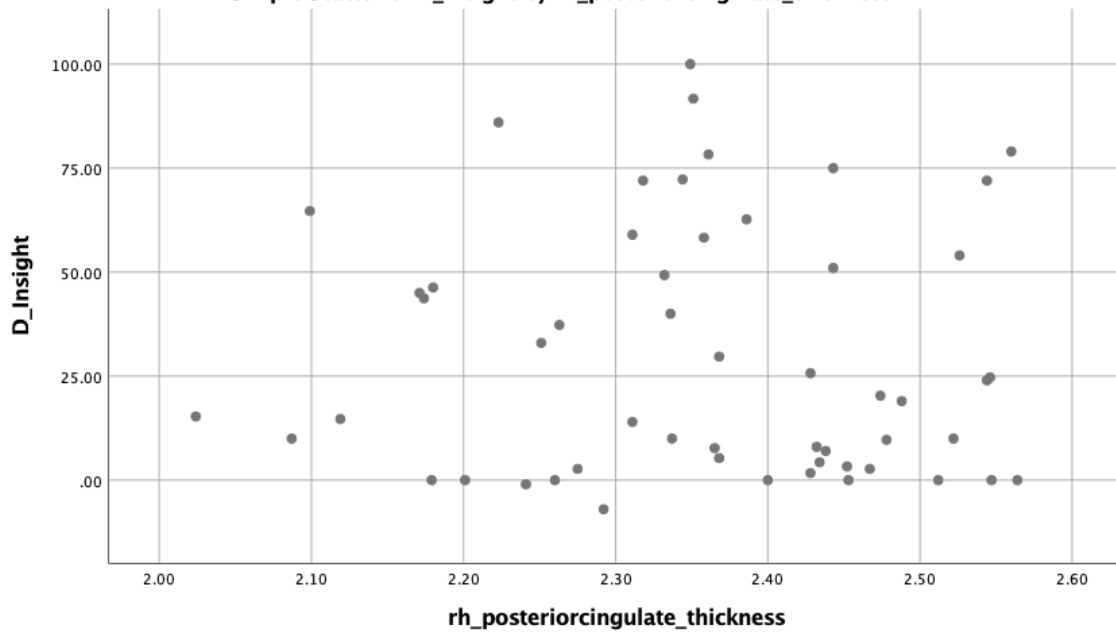

Supplement: biomedicines-08-00034-s001.pdf [file biomedicines-08-00034-s001.pdf]
